# Supplementary material for: Mimicking the Lipid Peroxidation Inhibitory Activity of Phospholipid Hydroperoxide Glutathione Peroxidase (GPx4) by Using Fatty Acid Conjugates of a Water-Soluble Selenolane
Source: MDPI journal article supplement (doi:10.3390/molecules200712364), 2015-07-07
Supplement: s1 [file s1]

# Supplementary Materials

## 1. Data of Lipid Peroxidation Experiments

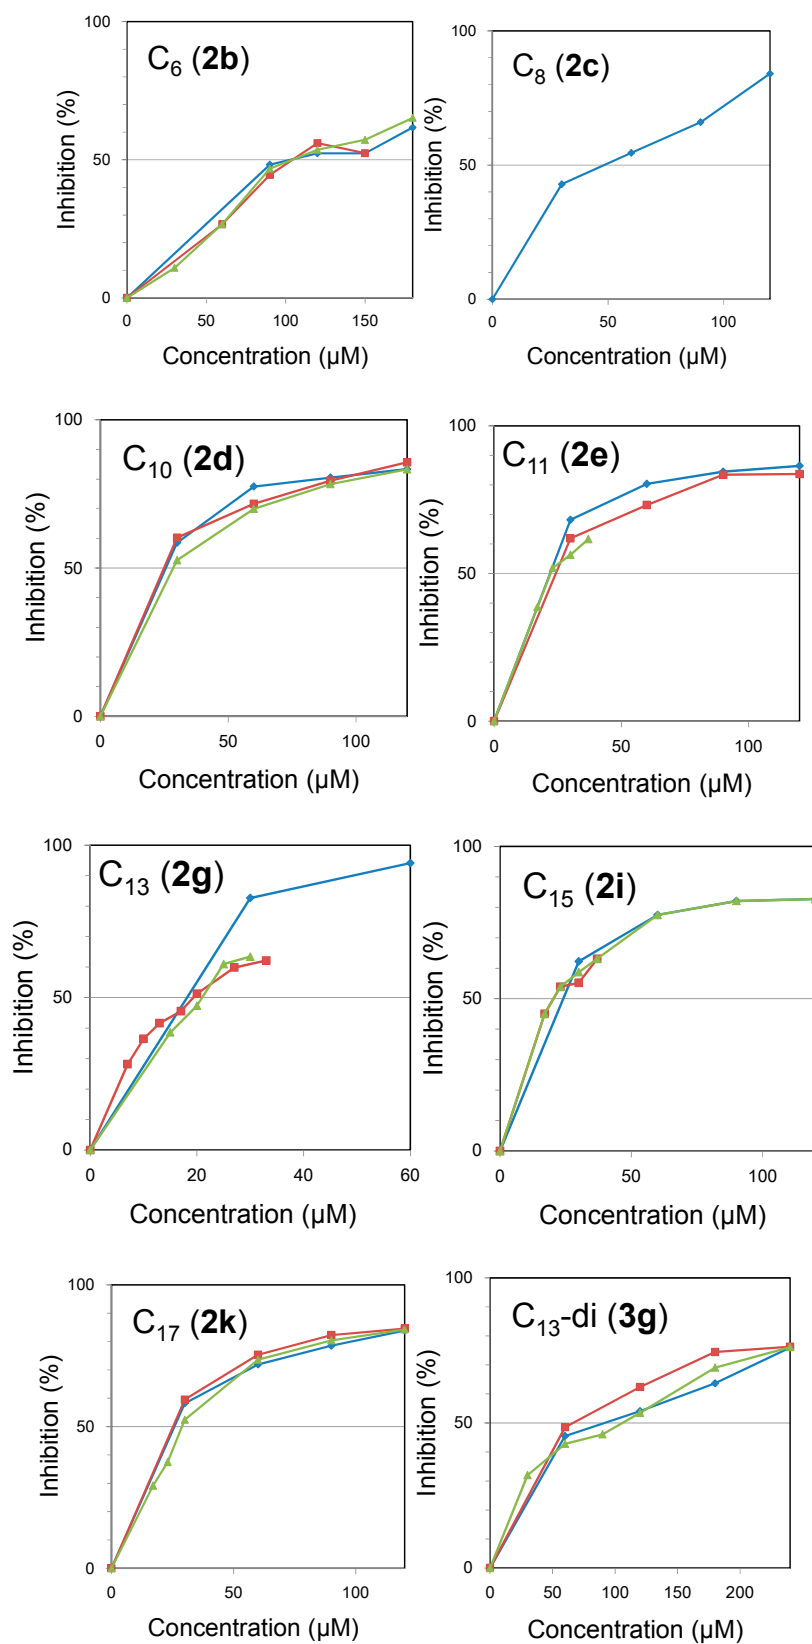

**Figure S1.** Inhibition ratio of lipid peroxidation in the lecithin-cholesterol liposome assay.

**Table S1.** 50% inhibitory concentrations ( $IC_{50}$ ) against lipid peroxidation obtained for **1–4** <sup>a</sup>.

| Compounds                     | $IC_{50}$ ( $\mu$ M) | Compounds                     | $IC_{50}$ ( $\mu$ M) | Compounds                         | $IC_{50}$ ( $\mu$ M) |
|-------------------------------|----------------------|-------------------------------|----------------------|-----------------------------------|----------------------|
| DHS ( <b>1</b> )              | $64 \pm 5^b$         | C <sub>11</sub> ( <b>2e</b> ) | $23 \pm 2$           | C <sub>16</sub> ( <b>2j</b> )     | $25 \pm 6^b$         |
| C <sub>3</sub> ( <b>2a</b> )  | $87 \pm 2^b$         | C <sub>12</sub> ( <b>2f</b> ) | $23 \pm 4^b$         | C <sub>17</sub> ( <b>2k</b> )     | $27 \pm 2$           |
| C <sub>6</sub> ( <b>2b</b> )  | $104 \pm 1$          | C <sub>13</sub> ( <b>2g</b> ) | $19 \pm 2$           | C <sub>18</sub> ( <b>2l</b> )     | $34 \pm 3^b$         |
| C <sub>8</sub> ( <b>2c</b> )  | $48^c$               | C <sub>14</sub> ( <b>2h</b> ) | $18 \pm 1^b$         | C <sub>13</sub> -di ( <b>3g</b> ) | $80 \pm 13$          |
| C <sub>10</sub> ( <b>2d</b> ) | $26 \pm 2$           | C <sub>15</sub> ( <b>2i</b> ) | $22 \pm 3$           | PhSeSePh ( <b>4</b> )             | $70 \pm 4^b$         |

<sup>a</sup> Errors are given as standard deviations. <sup>b</sup> Data are quoted from Ref. 12. <sup>c</sup> Measurement was carried out only once.

## 2. Data of Colony Formation Assays

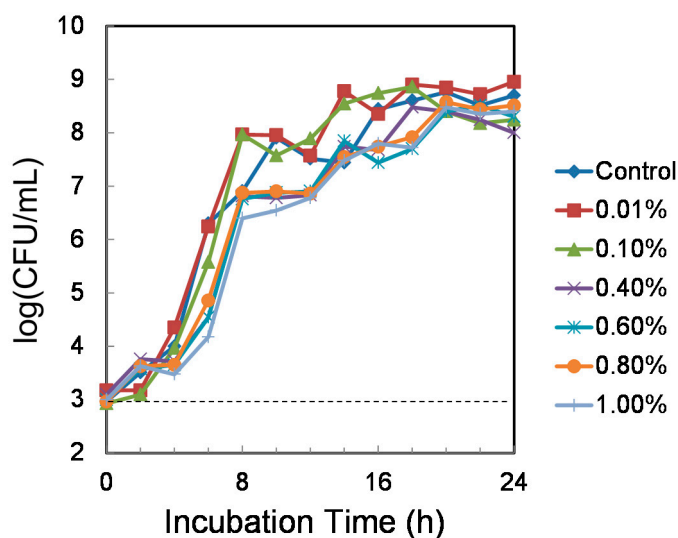**Figure S2.** The number of colony forming units (CFU) of NBRC3134 as a function of the incubation time in the presence of DHS (**1**).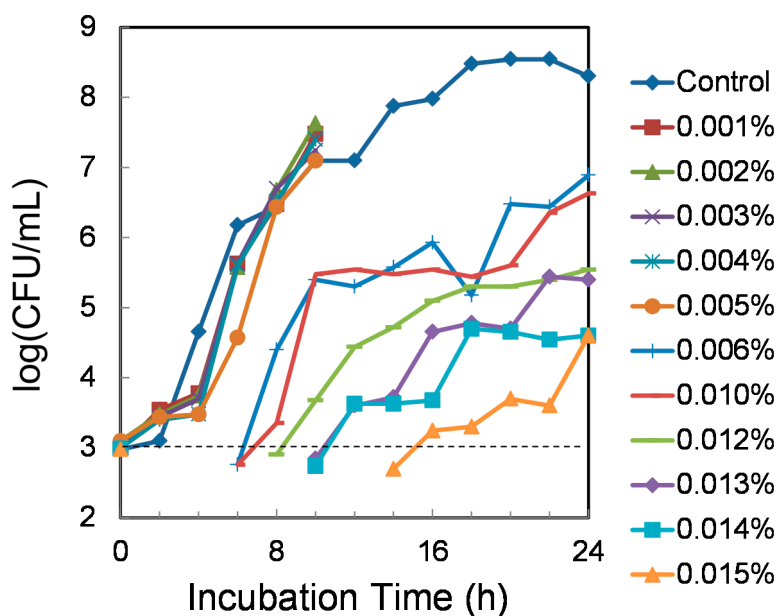**Figure S3.** The number of colony forming units (CFU) of NBRC3134 as a function of the incubation time in the presence of C<sub>14</sub> (**2h**).

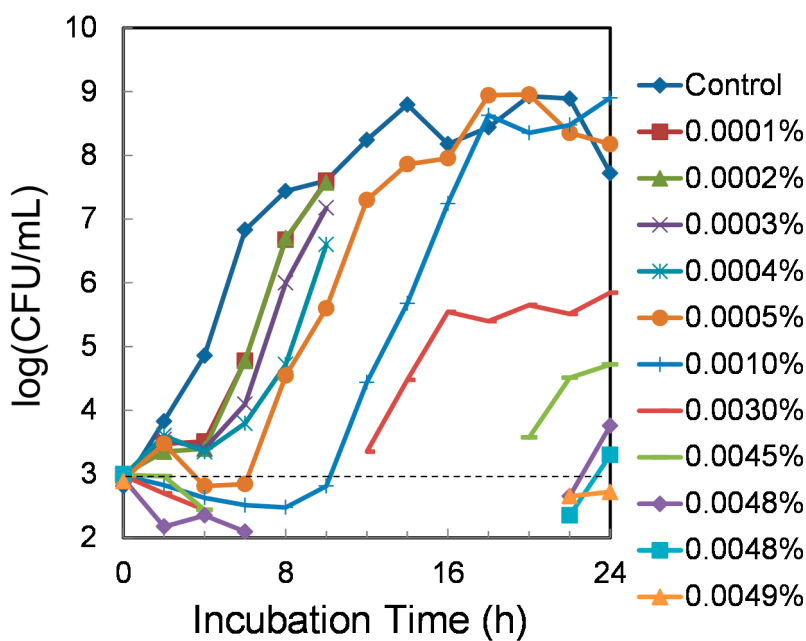

**Figure S4.** The number of colony forming units (CFU) of NBRC3134 as a function of the incubation time in the presence of PhSeSePh (**4**).

### 3. $^1\text{H}$ -, $^{13}\text{C}$ -, and $^{77}\text{Se}$ -NMR Spectra for **3b**

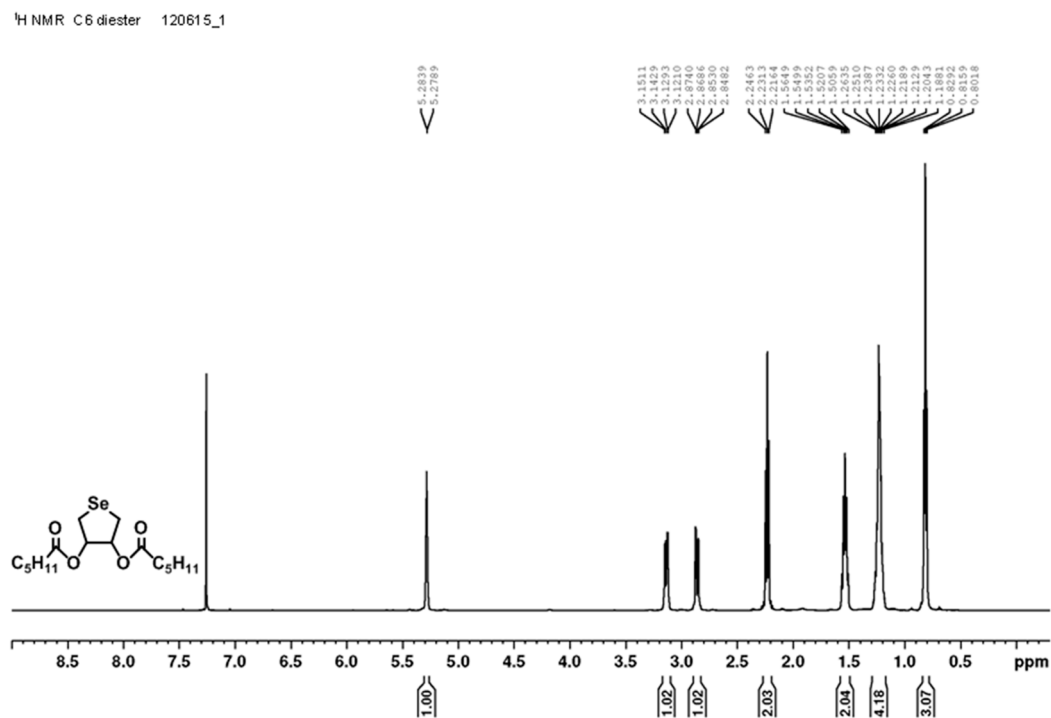

**Figure S5.**  $^1\text{H}$ -NMR Spectra for **3b**.

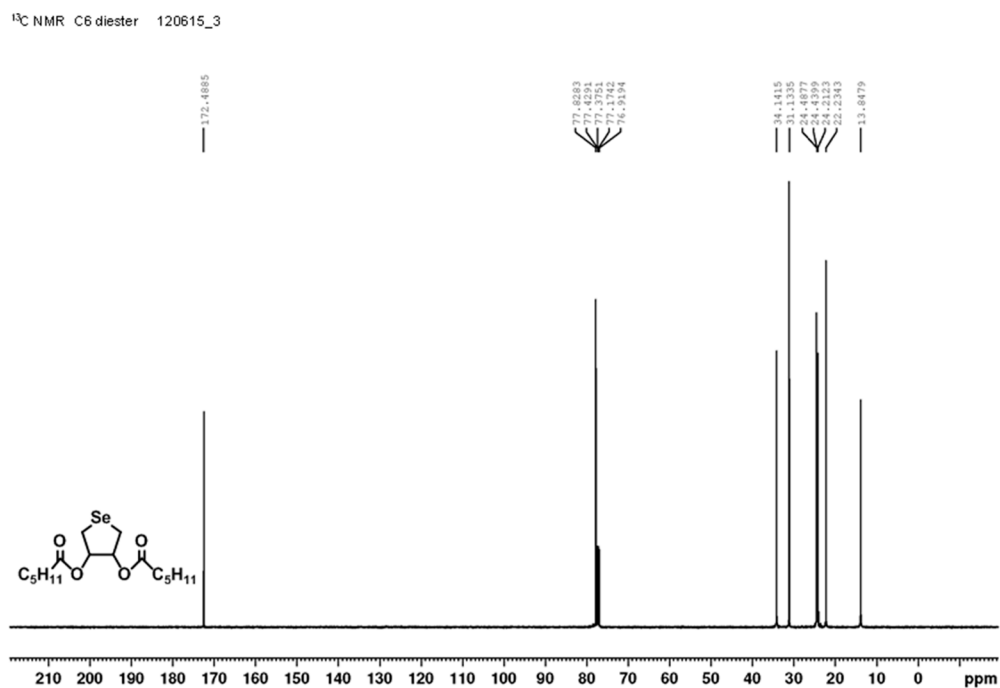Figure S6. <sup>13</sup>C-NMR Spectra for **3b**.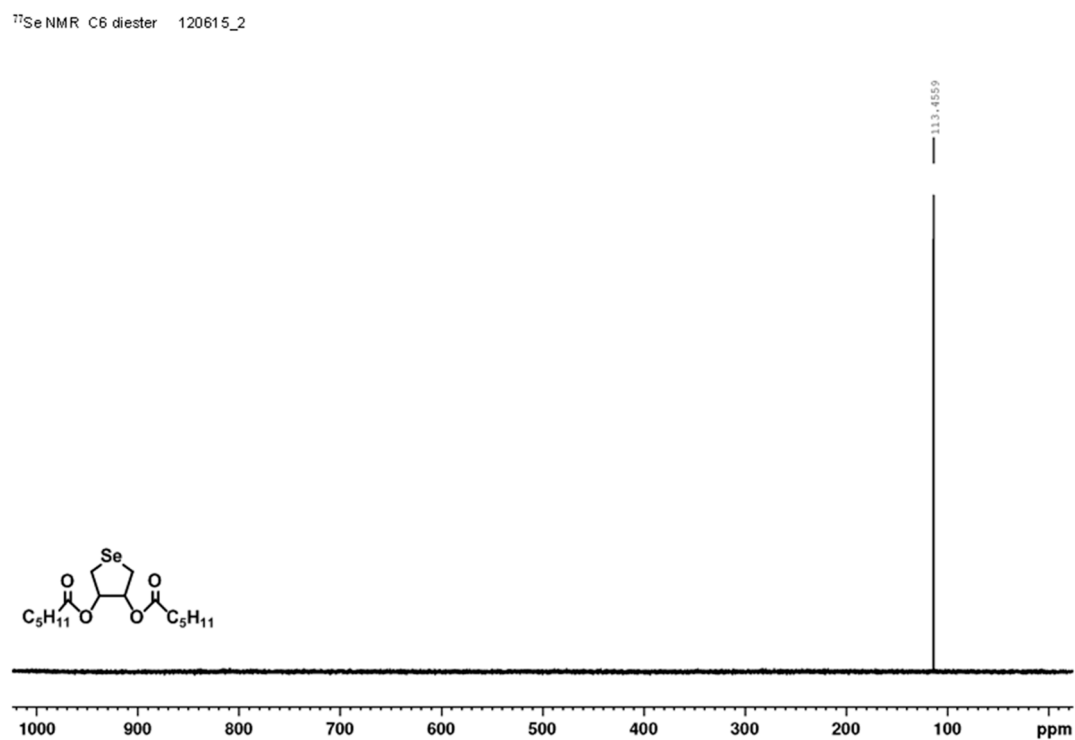Figure S7. <sup>77</sup>Se-NMR Spectra for **3b**.
